# Supplementary material for: Assessment of Berries of Some Sea Buckthorn Genotypes by Physicochemical Properties and Fatty Acid Content of the Seed
Source: MDPI journal article supplement (doi:10.3390/plants11243412), 2022-12-07
Supplement: s1 [file s1]

# Supplementary Materials: Assessment of Berries of some Sea Buckthorn Genotypes by Physicochemical Properties and Fatty Acid Content of the Seed

Mónika Máté<sup>1</sup>, Granit Selimaj<sup>1,2</sup>, Gergely Simon<sup>2</sup>, Lilla Szalóki-Dorkó<sup>1</sup>, Gitta Ficzek<sup>2\*</sup>

<sup>1</sup>Department of Fruit and Vegetable Processing Technology, Institute of Food Science and Technology, Hungarian University of Agriculture and Life Sciences

<sup>2</sup>Department of Fruit Growing, Institute of Horticulture, Hungarian University of Agriculture and Life Sciences

\* Correspondence: ficzek.gitta@uni-mate.hu

Table S1. Detailed list of analytes, compound names, trivial names, retention times (Rt) [min], and resolution (R) [-]

| Abbr.     | Compound               | Trivial Name                     | R <sub>t</sub> [min] | R [-] |
|-----------|------------------------|----------------------------------|----------------------|-------|
| C14:0     | Methyl myristate       | Myristic acid                    | 9.94                 | 39.0  |
| C15:0     | Methyl pentadecanoate  | Pentadecylic acid                | 11.05                | 14.4  |
| C16:0     | Methyl palmitate       | Palmitic acid                    | 12.43                | 15.8  |
| C16:1n-7c | Methyl palmitoleate    | Palmitoleic acid                 | 13.24                | 21.8  |
| C18:0     | Methyl stearate        | Stearic acid                     | 16.30                | 24.8  |
| C18:1n-9c | Methyl oleate          | Oleic acid                       | 17.20                | 6.0   |
| C18:2n-6c | Methyl linoleate       | Linoleic acid                    | 19.04                | 2.6   |
| C18:3n-3c | Methyl linoleate       | $\alpha$ -linolenic acid         | 21.56                | 17.6  |
| C20:0     | Methyl arachidate      | Arachidic acid                   | 21.95                | 5.9   |
| C20:1n-9c | Methyl eicosanoate     | Gondoic acid                     | 23.00                | 15.0  |
| C20:3n-6c | Methyl eicosatrienoate | dihomo- $\gamma$ -linolenic acid | 26.63                | 18.6  |
| C22:0     | Methyl behenate        | Behenic acid                     | 27.91                | 10.2  |
| C24:1n-9c | Methyl nervonate       | Nervonic acid                    | 31.02                | 8.2   |

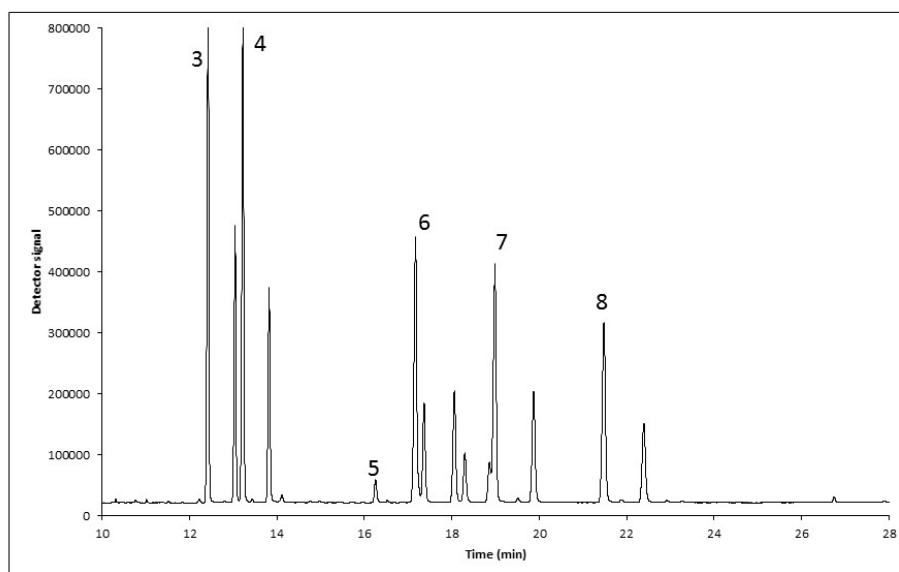

Figure S1. Chromatograms of R-01 candidate. (Peak 3: Palmitic acid; Peak 4: Palmitoleic acid; Peak 5: Stearic acid; Peak 6: Oleic acid; Peak 7: Linoleic acid; Peak 8:  $\alpha$ -linolenic acid)
